# Supplementary material for: Spectroscopic investigation of H atom transfer in a gas-phase dissociation reaction: McLafferty rearrangement of model gas-phase peptide ions
Source: Royal Society of Chemistry journal article supplement (doi:10.1039/b802314j), 2008-01-01

## SUPPORTING INFORMATION

### **Spectroscopic Investigation of H Atom Transfer in a Gas-phase Dissociation Reaction: McLafferty Rearrangement of Model Gas-phase Peptide Ions**

Michael J. Van Stipdonk\*, Dale R. Kersetter and Christopher M. Leavitt,  
*Department of Chemistry*  
*Wichita State University*  
*Wichita, KS 67260-0051*

Gary S. Groenewold  
*Idaho National Laboratory*  
*Idaho Falls, ID 26850*

Jeff Steill and Jos Oomens  
*FOM Institute for Plasma Physics “Rijnhuizen”*  
*Nieuwegein, The Netherlands*

Figure S1. Tandem mass spectra for the dissociation of (a) (BetGOtBu)<sup>+</sup> and (b) (BetGOH)<sup>+</sup> generated using multiple-stage CID in the quadrupole ion trap mass spectrometer.

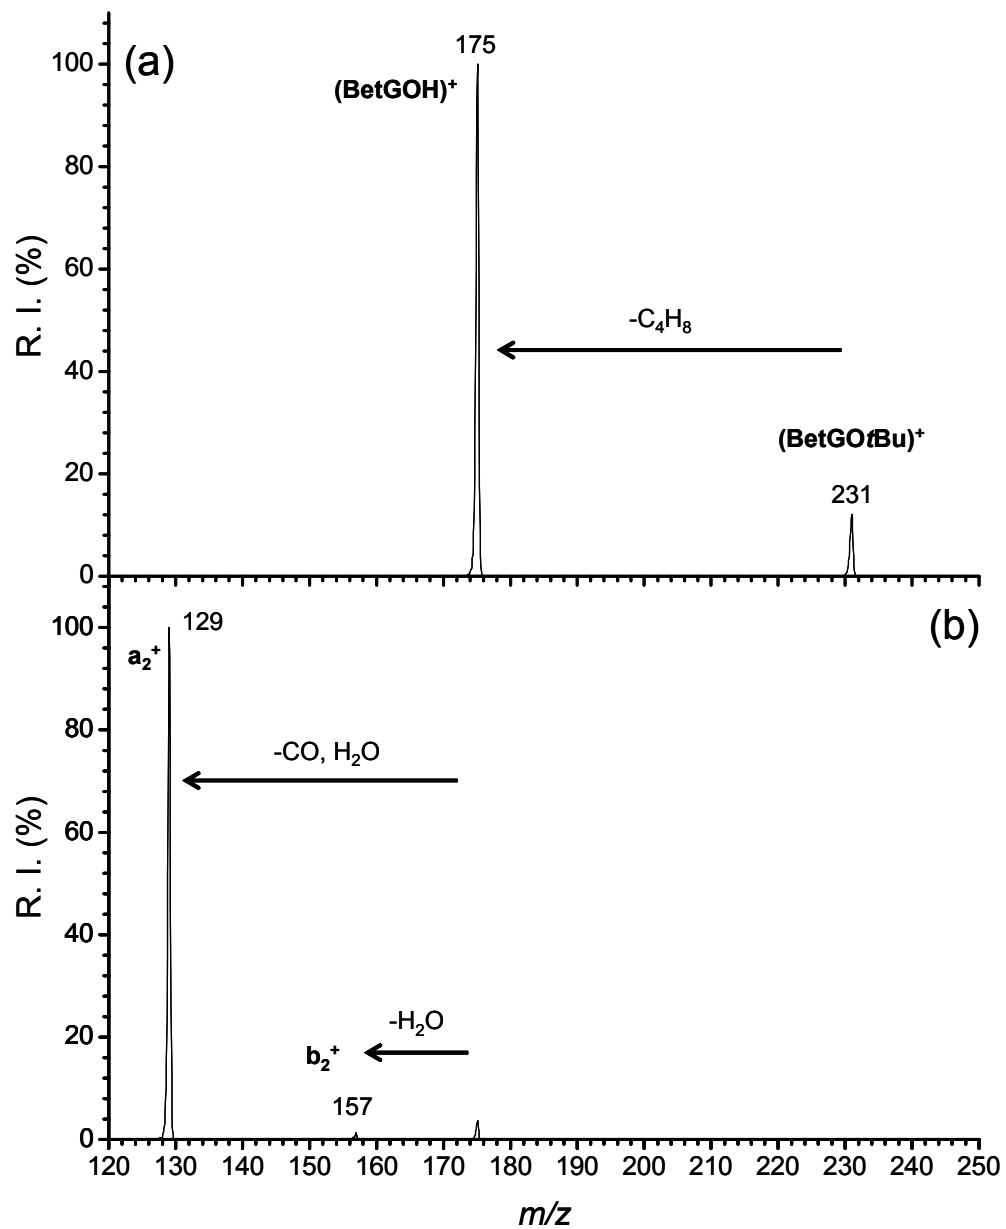

Figure S2. Tandem mass spectra generated from fully deuterium-exchanged betaine-glycine-*tert*-butyl ester using the quadrupole ion trap mass spectrometer: (a) dissociation of  $(M)^+$ ,  $d_1$ -BetGOtBu; (b) dissociation ( $MS^3$  stage) of  $(M)^+$ ,  $d_1$ -(BetGOH) $^+$ , product resulting from McLafferty rearrangement.

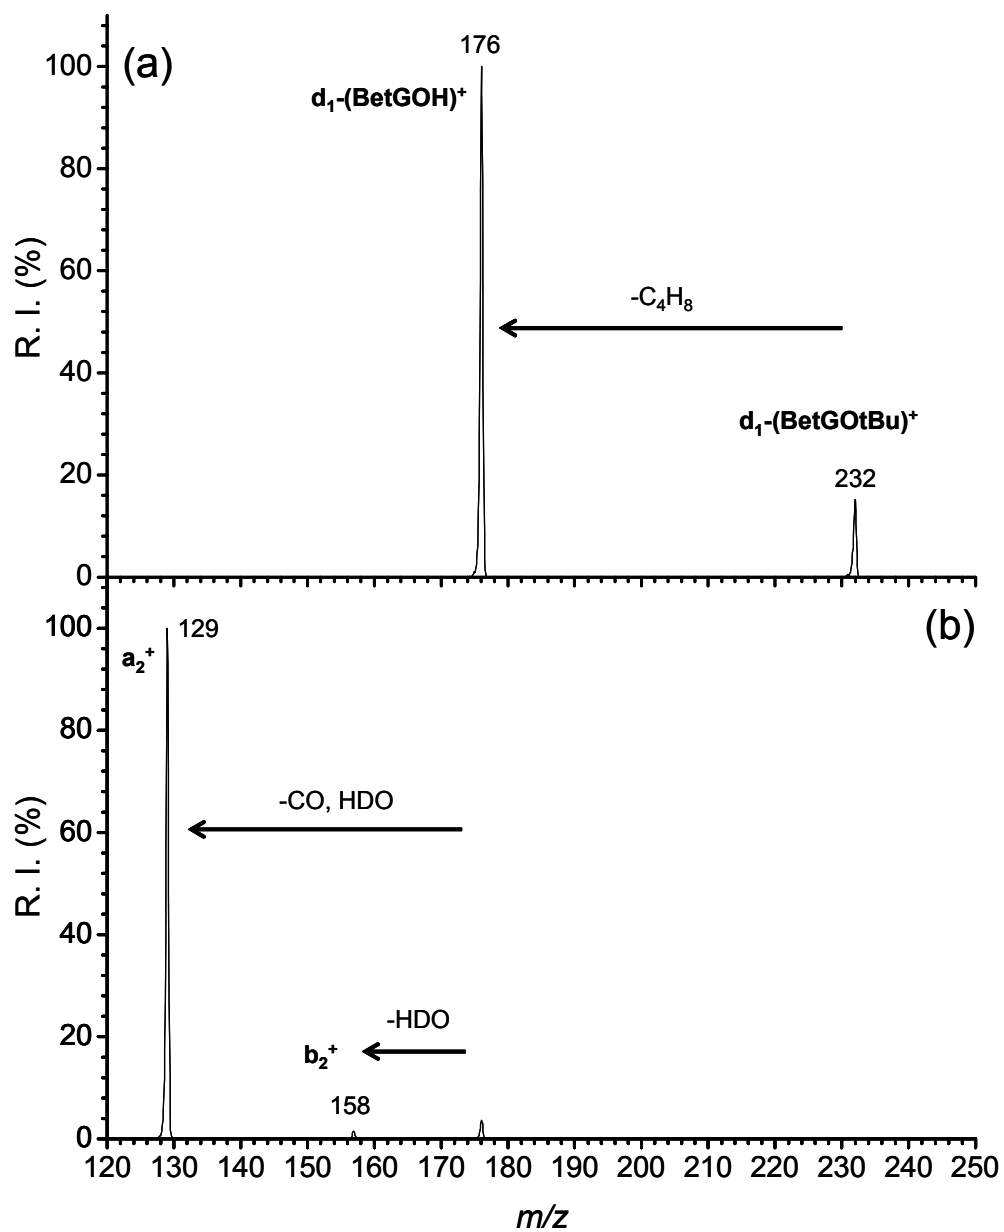

Figure S3. Comparison between IRMPD spectrum generated from (NicGGOH+H)<sup>+</sup> (a) and theoretical spectra based on DFT calculations for structures (b) Nic\_e, (c) Nic\_f, (d) Nic\_g, (e) Nic\_h and (f) Nic\_i. Conformations of the respective isomers are provided in figure 4 of the manuscript.

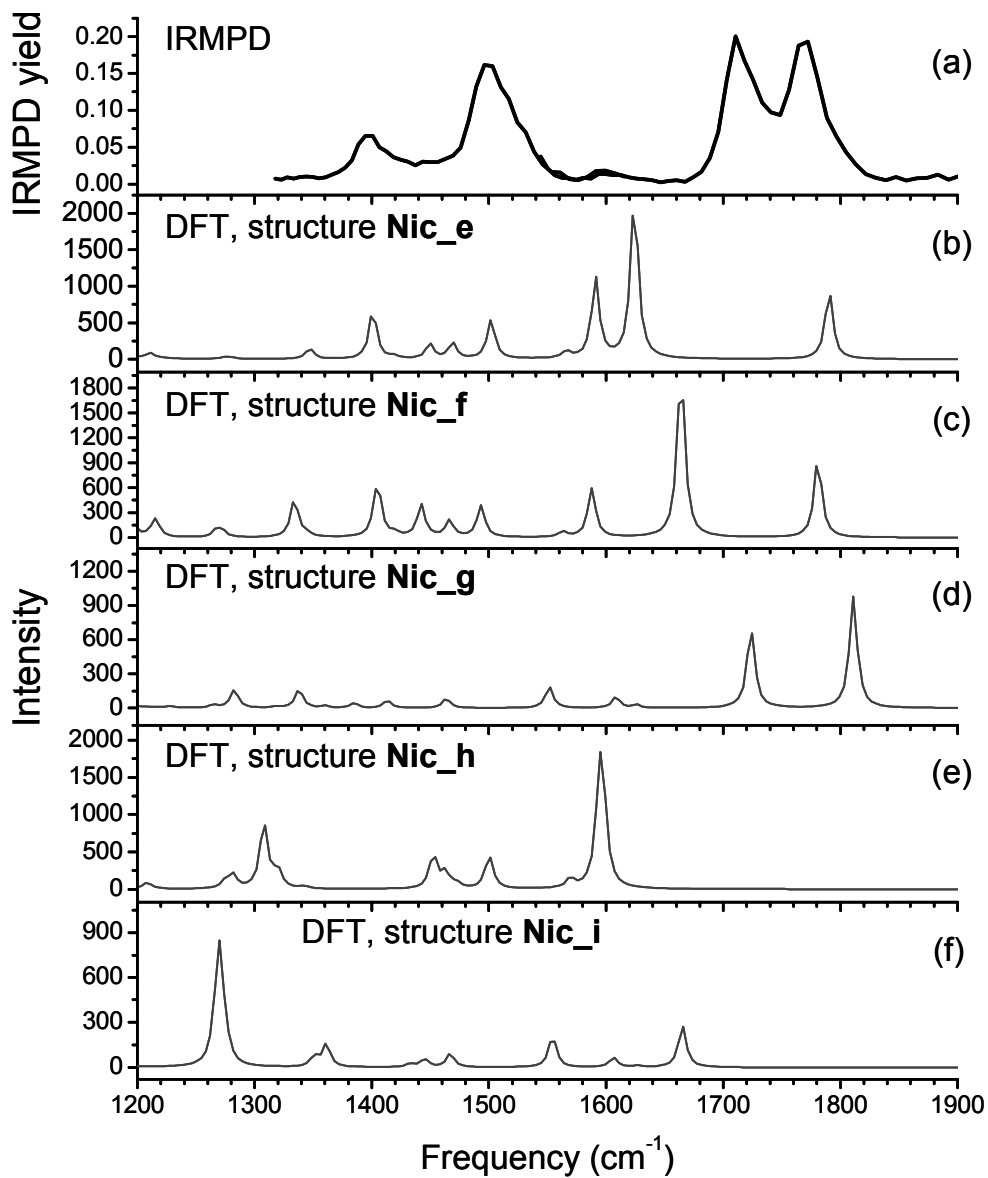

Supplement: b802314j.pdf [file b802314j.pdf]
